# Supplementary material for: Textural features of 18F-fluorodeoxyglucose positron emission tomography scanning in diagnosing aortic prosthetic graft infection
Source: Springer Nature journal article supplement (doi:10.1007/s00259-016-3599-7), 2016-12-24
Supplement: MOESM1 [file 11958476]

SUPPLEMENTAL TABLE 1

**First order texture features.**

*Notation:*

| *I*(*p,q,r*) | The three dimensional image matrix with *N* voxels and spatial position [*p, q, r*]. |
| --- | --- |
| *P* | The first order histogram with discrete intensity levels. |

| Feature | Parameter no. | Equation | Description |
| --- | --- | --- | --- |
| Minimum intensity | P1 | N/A | Minimum intensity. |
| Maximum intensity | P2 | N/A | Maximum intensity. |
| Range | P3 |  | Intensity range. |
| Mean intensity | P4 |  | Mean intensity. |
| Quantile 0.025 | P5 | N/A | 0.025 quantile. |
| Quantile 0.25 | P6 | N/A | 0.25 quantile. |
| Median intensity | P7 | N/A | Median intensity. |
| Quantile 0.75 | P8 | N/A | 0.75 quantile. |
| Quantile 0.975 | P9 | N/A | 0.975 quantile. |
| Sum intensity | P10 |  | Sum of all intensities. |
| Variance | P11 |  | Variance. |
| SD | P12 |  | Standard deviation. |
| Skewness | P13 |  | A measure of the asymmetry of the data around the sample mean. |
| Kurtosis | P14 |  | A measure of how outlier-prone a distribution is. |
| Energy | P15 |  | The summation of the squares of grey levels of the image. |
| Entropy | P16 |  | A measure of irregularity or randomness, which is largest for random grey level distributions. |
| Mean absolute deviation | P17 |  | The mean of the absolute deviations of all voxel intensities around the mean intensity value. |
| RMS | P18 |  | Root mean square. |
| Uniformity | P19 |  | A measure of how uniform a distribution is. |

**GLCM-based second order textural features.**

*Notation:*

|  | (i,j)th entry in a normalized GLCM. |
| --- | --- |
|  | Number of distinct grey levels in the quantized image. |
| and | and |
| and | and |
|  |  |
|  |  |
| and | The mean of and |
| and | The standard deviation of and |
|  | , the entropy of |
|  | , the entropy of |
|  |  |
|  |  |
|  |  |

| Feature | Parameter no. | Equation | Description |
| --- | --- | --- | --- |
| Autocorrelation | P20 |  | A measure of the coarseness of an image and an evaluation of the linear spatial relationships between texture primitives. |
| Contrast (inertia) | P21 |  | A measure of local variations present in the image. A high contrast value indicates a high degree of local variation. |
| Correlation | P22 |  | A measure of grey tone linear dependency of neighbouring cells. For an image with large areas of similar intensities, correlation is higher than for an image with noisier, uncorrelated intensities. |
| Haralick’s correlation | P23 |  | A measure of how correlated a voxel is to its neighbour over the whole image. |
| Cluster prominence | P24 |  | A measure of local intensity variation. |
| Cluster shade | P25 |  | A measure of the lack of symmetry of the matrix. High values represent asymmetric matrices. |
| Cluster tendency | P26 |  | Indicates into how many clusters the grey levels present in the image can be classified. |
| Dissimilarity | P27 |  | A measure that defines the variation of grey level pairs in an image. |
| Energy (Angular second moment) | P28 |  | Emphasizes local homogeneity of the image. Homogeneous images have few dominant grey tone transitions, which result into higher energy. |
| Entropy | P29 |  | A measure of non-uniformity (randomness) and spatial disorder of the grey-level distribution in the image. A completely random distribution has a high entropy because it represents chaos. |
| Homogeneity 1 | P30 |  | A measure of local homogeneity of an image, which measures the closeness of the distribution of elements in the GLCM to the GLCM diagonal; high values indicate smooth texture with low variation. |
| Homogeneity 2 | P31 |  | A measure of local homogeneity of an image, which measures the closeness of the distribution of elements in the GLCM to the GLCM diagonal; high values indicate smooth texture with low variation. |
| Maximum probability | P32 |  | Determines the grey level with the maximum probability in the GLCM. The maximum probability is expected to be high if the occurrence of the most predominant voxel pair is high. |
| Sum of squares: variance | P33 |  | A measure of heterogeneity, which characterizes the distribution of grey levels around the mean. This feature puts relatively high weights on the elements that differ from the average value of the GLCM. |
| Sum average | P34 |  | A measure of the relation between clear and dense areas in an image. |
| Sum entropy | P35 |  | Entropy of the sum histogram. |
| Sum variance | P36 |  | Variance of the sum histogram. |
| Difference variance 1 | P37 |  | Variance of the difference histogram. |
| Difference variance 2 | P38 |  | Variance of the difference histogram. |
| Difference entropy | P39 |  | Entropy of the difference histogram. |
| Information measure of correlation 1 | P40 |  | This measure is a function of the joint probability density distribution *p*(*x,y*) of the two variables *x* and *y*, and is invariant under a change of parameterization *x′* = *f*(*x*), *y′* = *g*(*y*), and reduces to the classical correlation coefficient when *p*(*x, y*) is normal. |
| Information measure of correlation 2 | P41 |  | This measure is a function of the joint probability density distribution *p*(*x,y*) of the two variables *x* and *y*, and is invariant under a change of parameterization *x′* = *f*(*x*), *y′* = *g*(*y*), and reduces to the classical correlation coefficient when *p*(*x, y*) is normal. |
| Inverse difference normalized | P42 |  | A measure of image local homogeneity as it assumes larger values for smaller grey tone differences in pair elements. It is more sensitive to the presence of near diagonal elements in the GLCM. |
| Inverse difference moment normalized | P43 |  | A measure of image local homogeneity as it assumes larger values for smaller grey tone differences in pair elements. It is more sensitive to the presence of near diagonal elements in the GLCM. |

**GLRLM-based second order textural features.**

*Notation:*

|  | (i,j)th entry in a GLRLM. |
| --- | --- |
| and | and |
|  |  |
|  |  |

| Feature | Parameter no. | Equation | Description |
| --- | --- | --- | --- |
| Short Run Emphasis | P44 |  | Is highly dependent on the occurrence of short runs and is expected large for fine textures. |
| Long Run Emphasis | P45 |  | Is highly dependent on the occurrence of long runs and is expected large for coarse textures. |
| Grey-Level Nonuniformity | P46 |  | Measures the similarity of grey level values throughout the image and is expected small if grey level values are alike throughout the image. |
| Run Length Nonuniformity | P47 |  | Measures the similarity of the length of runs throughout the image and is expected small if run lengths are alike throughout the image. |
| Run Percentage | P48 |  | Measures the homogeneity and the distribution of runs of an image in a specific direction and is expected large for images with a homogeneous texture. |
| Low Grey-Level Run Emphasis | P49 |  | Is highly dependent on the occurrence of runs with low grey levels. |
| High Grey-Level Run Emphasis | P50 |  | Is highly dependent on the occurrence of runs with high grey levels. |
| Short Run Low Grey-Level Emphasis | P51 |  | Is highly dependent on the occurrence of short runs with low grey levels. |
| Short Run High Grey-Level Emphasis | P52 |  | Is highly dependent on the occurrence of short runs with high grey levels. |
| Long Run Low Grey-Level Emphasis | P53 |  | Is highly dependent on the occurrence of long runs with low grey levels. |
| Long Run High Grey-Level Emphasis | P54 |  | Is highly dependent on the occurrence of long runs with high grey levels. |

**GLSZM-based second order textural features.**

*Notation:*

|  | (i,j)th entry in a GLSZM. |
| --- | --- |
| and | and |
|  |  |
|  |  |

| Feature | Parameter no. | Equation | Description |
| --- | --- | --- | --- |
| Small Zone Emphasis | P55 |  | Is highly dependent on the occurrence of small zones and is expected large for fine textures. |
| Large Zone Emphasis | P56 |  | Is highly dependent on the occurrence of large zones and is expected large for fine textures. |
| Grey-Level Nonuniformity | P57 |  | Measures the similarity of grey level values throughout the image and is expected small if grey level values are alike throughout the image. |
| Size Zone Nonuniformity | P58 |  | Measures the similarity of the length of runs throughout the image and is expected small if size zones are alike throughout the image. |
| Zone Percentage | P59 |  | Measures the homogeneity and the distribution of size zones of an image in a specific direction and is expected large for images with a homogeneous texture. |
| Low Grey-Level Zone Emphasis | P60 |  | Is highly dependent on the occurrence of zones with low grey levels. |
| High Grey-Level Zone Emphasis | P61 |  | Is highly dependent on the occurrence of zones with high grey levels. |
| Small Zone Low Grey-Level Emphasis | P62 |  | Is highly dependent on the occurrence of small zones with low grey levels. |
| Small Zone High Grey-Level Emphasis | P63 |  | Is highly dependent on the occurrence of small zones with high grey levels. |
| Large Zone Low Grey-Level Emphasis | P64 |  | Is highly dependent on the occurrence of large zones with low grey levels. |
| Large Zone High Grey-Level Emphasis | P65 |  | Is highly dependent on the occurrence of large zones with high grey levels. |
